# Supplementary material for: Cu/Cu2O nanocrystals for electrocatalytic carbon dioxide reduction to multi-carbon products
Source: Royal Society of Chemistry journal article supplement (doi:10.1039/d2cc06986e), 2023-01-01
Supplement: d2cc06986e1.pdf [file d2cc06986e1.pdf]

# Cu/Cu<sub>2</sub>O nanocrystals for electrocatalytic carbon dioxide reduction to multi-carbon products

Yisen Yang,<sup>a,b</sup> Zhonghao Tan,<sup>a,b</sup> Sha Wang,<sup>a,b</sup> Yanyue Wang,<sup>a,b</sup> Jingyang Hu,<sup>a,b</sup> Zhuizhui Su,<sup>a,b</sup> Yingzhe Zhao,<sup>a,b</sup> Jing Tai,<sup>a</sup> and Jianling Zhang<sup>\*a,b</sup>

---

a *Beijing National Laboratory for Molecular Sciences, CAS Key Laboratory of Colloid, Interface and Chemical Thermodynamics, CAS Research/Education Center for Excellence in Molecular Sciences, Institute of Chemistry, Chinese Academy of Sciences, Beijing 100190 (P. R. China)*

*E-mail: zhangjl@iccas.ac.cn*

b *School of Chemical Sciences, University of Chinese Academy of Sciences, Beijing 100049 (P. R. China)*

## Experimental Sections

**Materials:** Potassium sulfate ( $K_2SO_4$ , 99%), potassium phosphate ( $K_2HPO_4$ , 98%), potassium bicarbonate ( $KHCO_3$ , 99.5%), copper chloride dihydrate ( $CuCl_2 \cdot 2H_2O$ ,  $\geq 99\%$ ), commercial cuprous oxide ( $Cu_2O$ ), Cu foil, dimethylamine borane (DMAB, 98%), deuterated water ( $D_2O$ , 99.9%) and dimethyl sulfoxide (DMSO, 99.0%) were purchased from Beijing InnoChem Science & Technology Co., Ltd. Carbon dioxide ( $CO_2$ , 99.999%), Argon (Ar, 99.999%) and deionized (DI) water were supplied by Beijing Analysis Instrument Factory. Methanol ( $CH_3OH$ ) was provided by Beijing Chemical works. Nafion D-521 dispersion (5% w/w in water and 1-propanol,  $\geq 0.92$  meq  $g^{-1}$  exchange capacity), Nafion N-117 membrane and Toray carbon paper (TGP-H-060) were purchased from Alfa Aesar China Co., Ltd. All reagents were used directly without further treatment.

**Synthesis of Cu/Cu<sub>2</sub>O nanocrystals:** Cu/Cu<sub>2</sub>O nanocrystals were synthesized by a wet-chemical method. First, 4 mL of 1 M  $CuCl_2 \cdot 2H_2O$  aqueous solution was added to 10 mL of DI water. Then, 4 mL of 1 M DMAB aqueous solution was added dropwise to above solution. After 3 h reaction at 25 °C and air atmosphere, the product was separated by suction filtration, washed several times by copious deionized water and dried in vacuum at 60 °C overnight.

**Characterizations:** X-ray diffraction (XRD) was determined by a Rigaku D/max-2500 X-ray diffractometer (Rigaku Corporation, Tokyo, Japan) with Cu  $K\alpha$  radiation at 40 kV and 200 mA. The morphologies were characterized by scanning electron microscopy (SEM, Hitachi S-4800) equipped with energy dispersive X-ray elemental (EDX) mapping, transmission electron microscopy (TEM, JEOL-1011) and high-resolution TEM (HRTEM, JEOL-2100F). Fourier transform infrared (FT-IR) spectroscopy was performed by a Bruker Tensor 27 spectrometer. X-ray photoelectron spectroscopy (XPS) was determined by a Thermo Fisher Scientific ESCALAB 250Xi (Thermo Fisher Scientific, Waltham, MA, USA) using 200 W Al  $K\alpha$  radiation. X-ray absorption fine structure (XAFS) data were collected at 1W2B station at Beijing Synchrotron Radiation Facility (BSRF, Beijing, China).

**Electrochemical tests:** All electrochemical tests were carried out in H-cell by using a CHI660E electrochemical workstation. Before each electrochemical experiment, electrolyte was saturated with  $CO_2$  for at least 40 min. The hydrophobic carbon paper ( $1 \times 0.5$   $cm^{-2}$ ) coated with catalyst was used as working electrode. Ag/AgCl electrode and Pt net ( $1 \times 1$   $cm^{-2}$ ) were used as reference electrode and counter electrode, respectively. For the preparation of working electrode, 10 mg of catalyst, 40  $\mu$ L of Nafion D-521 dispersion and 760  $\mu$ L of  $CH_3OH$  were mixed to form the catalyst ink. The ink was then dropcasted onto carbon paper to ensure the loading of 0.75  $mg$   $cm^{-2}$ . The flow rate of  $CO_2$  was adjusted to be 20  $mL$   $min^{-1}$  by gas flow meter.

Because  $K_2SO_4$  aqueous solution does not have buffering capacity, the pH value changes dynamically with time during electrolysis. Therefore, Ag/AgCl scale instead of reversible hydrogen electrode scale was used for all potentials in this article.

**Product analysis:** For gaseous products, 2 mL of gas extracted from gas bag was injected to gas chromatography (GC, Agilent 8890; Agilent Technologies Inc., CA, USA) with a thermal conductivity detector (TCD) detector using high purity Ar as carrier gas. For liquid products, 200  $\mu$ L of electrolyte, 200  $\mu$ L of  $D_2O$  and 100  $\mu$ L of 6 mM DMSO solution were mixed and then detected by  $^1H$  nuclear magnetic resonance ( $^1H$  NMR, Bruker AVANCE III 400 HD; Bruker, Germany). The Faradaic efficiency (FE) was calculated by the following formulation:

$$FE = \frac{\text{Moles of product} * n * F}{Q} * 100\%$$

(Q: charge (C); n: the number of electrons required to generate the product; F: Faraday constant (96485 C/mol)).

**In situ Raman spectroscopy:** In situ Raman spectroscopy was carried out by using a Horiba LabRAM HR Evolution Raman microscope (HORIBA Scientific, Paris, France). The laser wavelength was controlled at 785 nm. 0.10 M  $K_2SO_4$  aqueous solution was used as electrolyte. The gas diffusion layer (YLS-30T) coated with catalyst, Ag/AgCl electrode and carbon rod were used as working electrode, reference electrode and counter electrode, respectively. The in situ Raman electrolytic cell was purchased from Gaoss Union (Tianjin) Photoelectric Technology Company (Tianjin, China).

## Results and Discussion

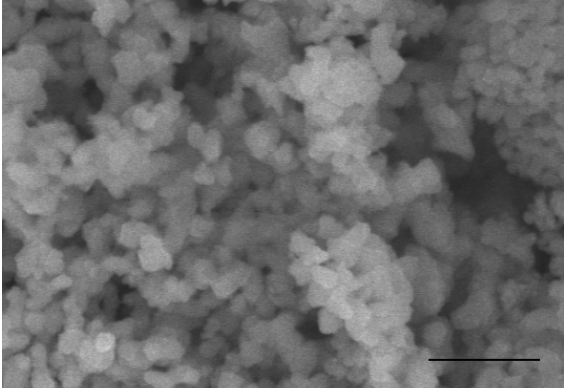

**Fig. S1** (a) SEM image of Cu/Cu<sub>2</sub>O nanocrystals. (b) Size histogram (>100 particles) of Cu/Cu<sub>2</sub>O nanocrystals by analysing SEM image (Fig. 1b) statistically. Scale bar: 500 nm in a.

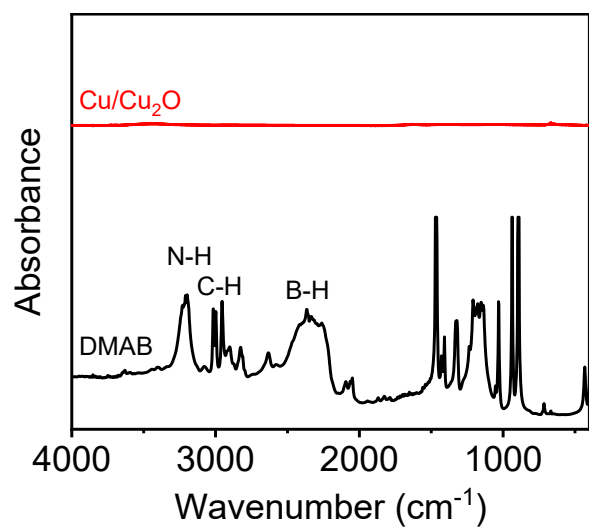

**Fig. S2** FT-IR spectra of Cu/Cu<sub>2</sub>O nanocrystals and DMAB. The characteristic vibrations of DMAB were not detected in Cu/Cu<sub>2</sub>O nanocrystals,<sup>1</sup> indicating its complete removal.

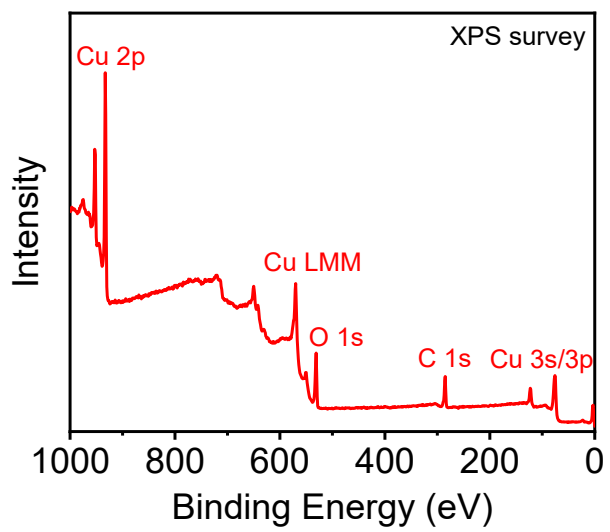

**Fig. S3** XPS survey of Cu/Cu<sub>2</sub>O nanocrystals.

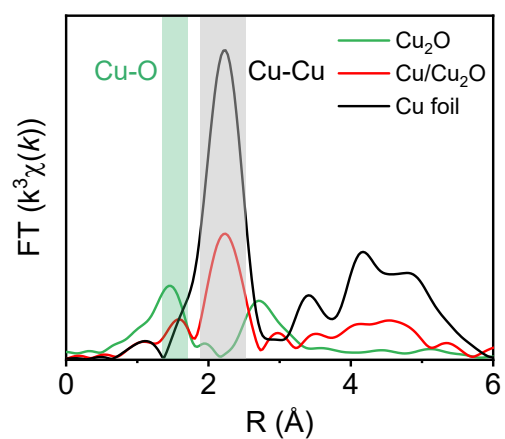

**Fig. S4** The  $k^3$ -weighted Fourier-transformed extended X-ray absorption fine structure spectra of  $\text{Cu}/\text{Cu}_2\text{O}$  nanocrystals, Cu foil and commercial  $\text{Cu}_2\text{O}$ .

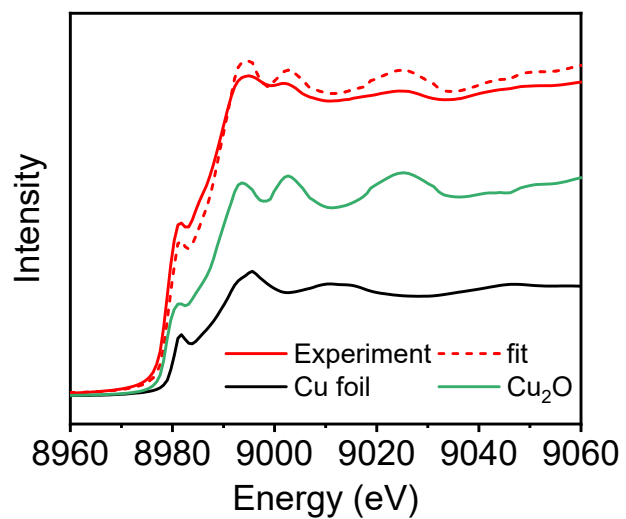

**Fig. S5** Cu K-edge X-ray absorption near-edge structure linear combination fitting of Cu/Cu<sub>2</sub>O nanocrystals.

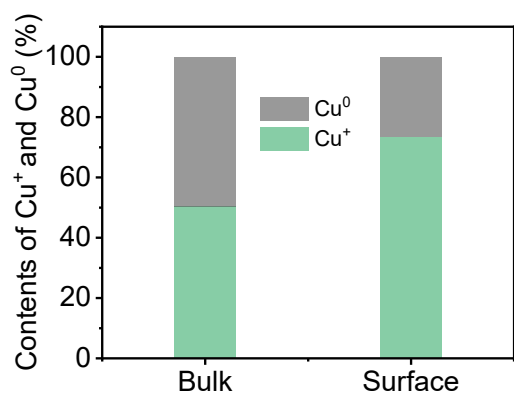

**Fig. S6** Contents of Cu<sup>+</sup> and Cu<sup>0</sup> in bulk and surface.



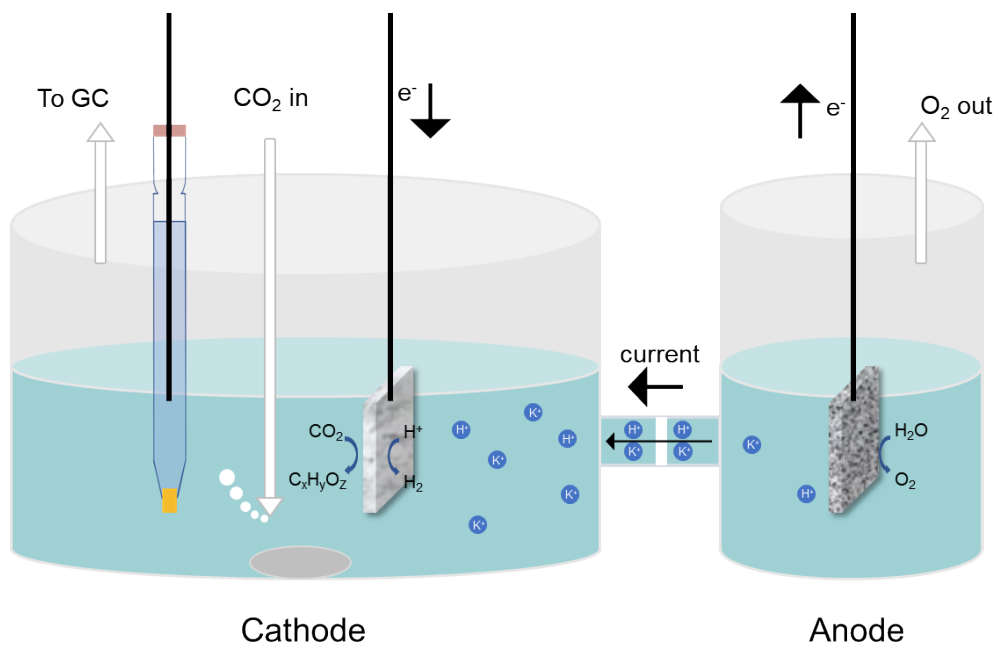

**Fig. S7** Illustration of H-cell used in electrocatalytic CO<sub>2</sub> reduction reaction (ECO<sub>2</sub>RR).

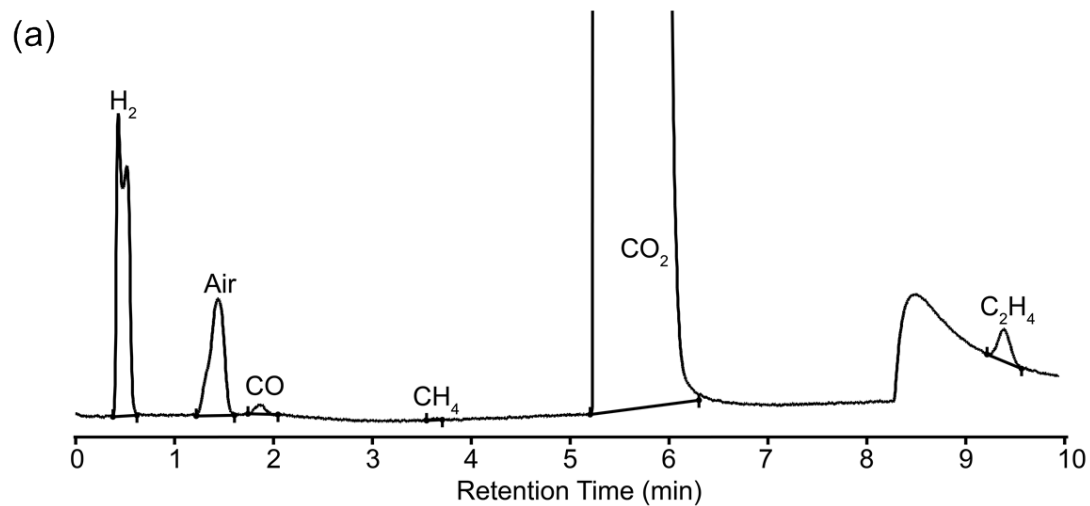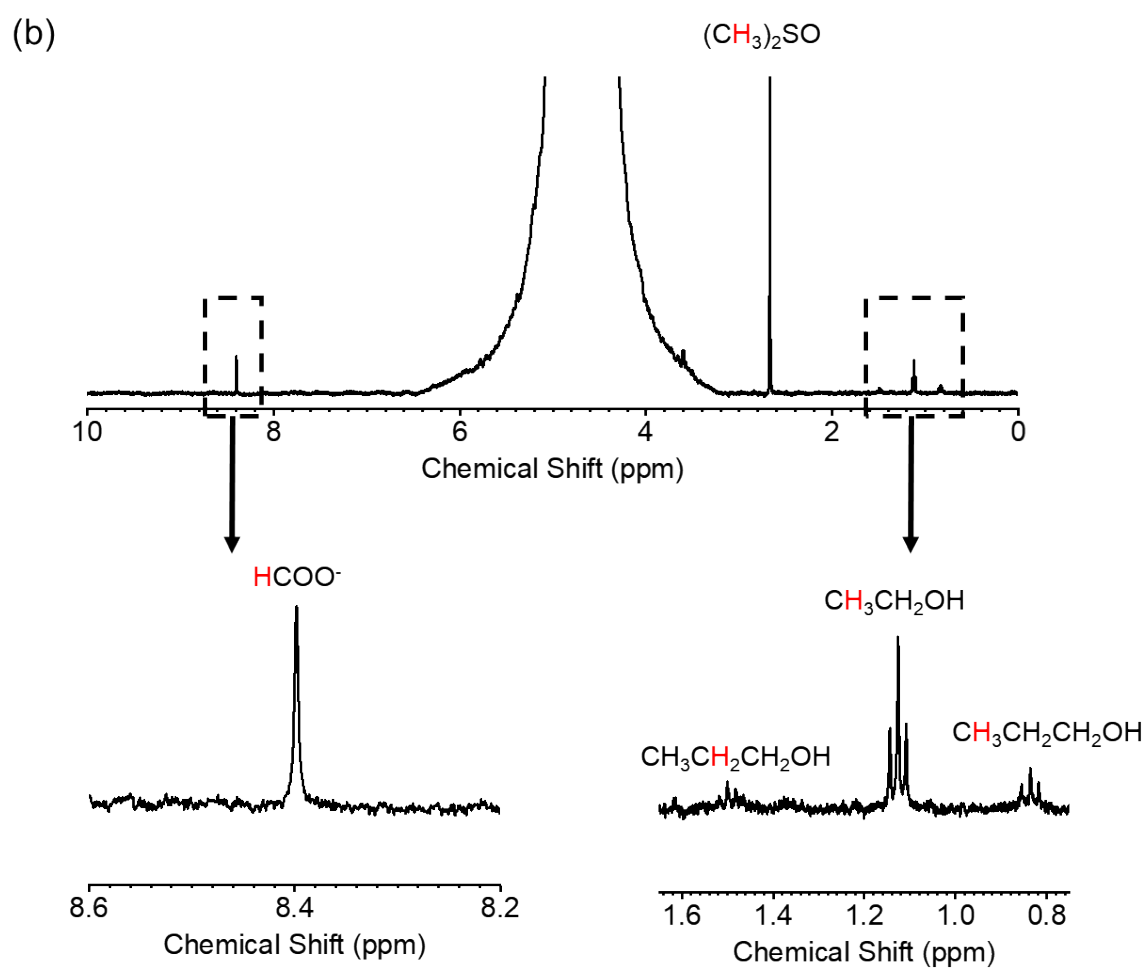

**Fig. S8** A typical (a) GC spectrum and (b)  $^1H$  NMR spectrum of the products after electrolysis using Cu/Cu<sub>2</sub>O nanocrystals.

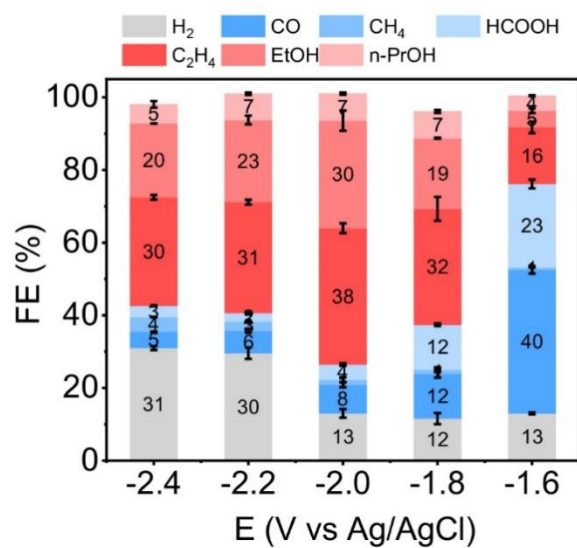

Fig. S9 FE values of all detectable products at potentials ranging from -1.6 to -2.4 V in 0.10 M K<sub>2</sub>SO<sub>4</sub>.

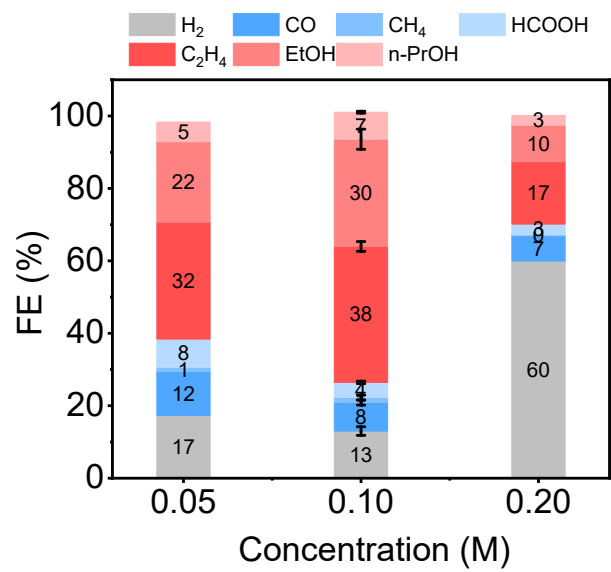

**Fig. S10** FE values of all detectable products on Cu/Cu<sub>2</sub>O nanocrystals at -2.0 V in 0.05, 0.10 and 0.20 M K<sub>2</sub>SO<sub>4</sub>.

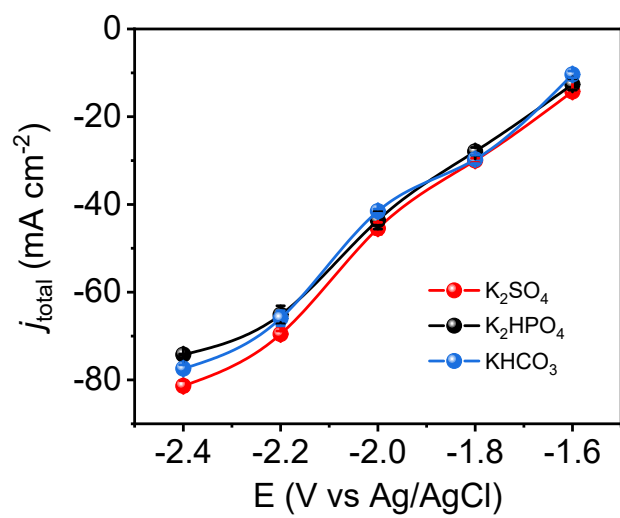

**Fig. S11** The total current densities at potentials ranging from -1.6 V to -2.4 V in different electrolytes.

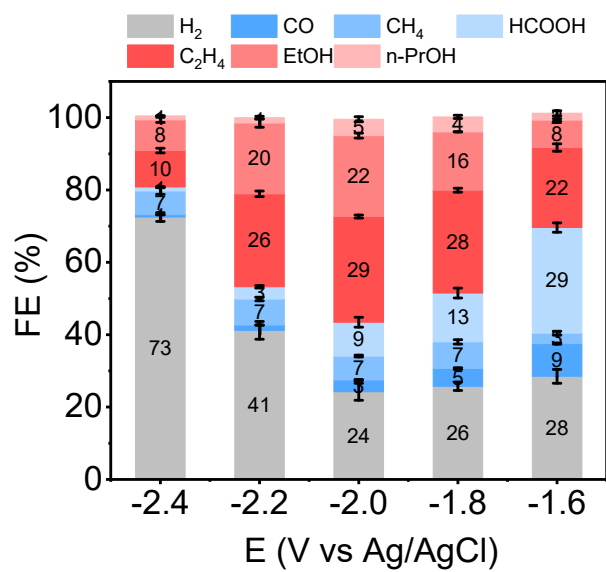

**Fig. S12** FE values of all detectable products at potentials ranging from -1.6 to -2.4 V in 0.20 M KHCO<sub>3</sub>.

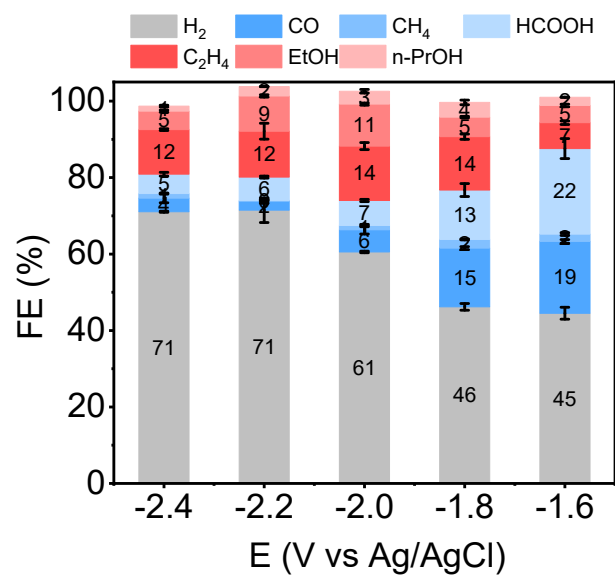

Fig. S13 FE values of all detectable products at potentials ranging from -1.6 to -2.4 V in 0.10 M K<sub>2</sub>HPO<sub>4</sub>.

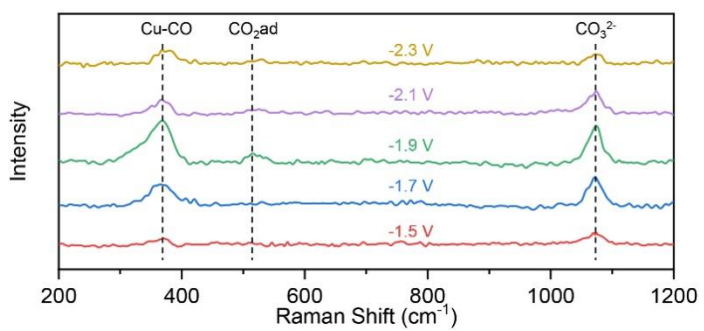

**Fig. S14** In situ Raman spectra at various applied potentials.



**Table S1.** The comparison of multi-carbon products in ECO<sub>2</sub>RR on various Cu-based catalysts in H-cell.

| Catalysts                             | FE (%) | Partial current density (mA cm <sup>-2</sup> ) | Electrolyte                          | Reference                                     | Year |
|---------------------------------------|--------|------------------------------------------------|--------------------------------------|-----------------------------------------------|------|
| Cu/Cu <sub>2</sub> O nanocrystals     | 75.0   | 34.4                                           | 0.1 M K <sub>2</sub> SO <sub>4</sub> | This work                                     |      |
| Cu/Cu <sub>2</sub> O-CV               | 73.4   | ~ 4                                            | 0.1 M KHCO <sub>3</sub>              | <i>ACS Catal.</i> <sup>2</sup>                | 2022 |
| Cu/Cu <sub>2</sub> O aerogel networks | 80.8   | 66.4                                           | 0.1 M KCl                            | <i>Adv. Funct. Mater.</i> <sup>3</sup>        | 2021 |
| Cu/Cu <sub>2</sub> O@N-doped graphene | 56.0   | 19.0                                           | 0.2 M KI                             | <i>J. CO<sub>2</sub> Util.</i> <sup>4</sup>   | 2021 |
| Cu@Cu <sub>2</sub> O                  | 50     | ~ 9                                            | 0.1 M KHCO <sub>3</sub>              | <i>J. Colloid Interface Sci.</i> <sup>5</sup> | 2019 |
| IL@Cu                                 | 77.2   | 26.4                                           | 0.1 M KHCO <sub>3</sub>              | <i>Angew. Chem. Int. Ed.</i> <sup>6</sup>     | 2022 |
| Dense vertical lamellate Cu           | 80.5   | ~ 45                                           | 0.5 M KCl                            | <i>Nat. Commun.</i> <sup>7</sup>              | 2022 |
| Cu-PTFE-nanoneedles                   | 86     | 53.78                                          | 0.1 M KHCO <sub>3</sub>              | <i>J. Am. Chem. Soc.</i> <sup>8</sup>         | 2022 |
| e-CuOH/Cl nanosheet                   | 54     | ~ 10                                           | 0.1 M KHCO <sub>3</sub>              | <i>Angew. Chem. Int. Ed.</i> <sup>9</sup>     | 2021 |
| Cu-KI                                 | 72.6   | 29                                             | 0.1 M KHCO <sub>3</sub>              | <i>Nat. Commun.</i> <sup>10</sup>             | 2020 |
| Oxygen-bearing Cu micropore nanowires | 45     | 44.7                                           | 0.5 M KHCO <sub>3</sub>              | <i>J. Am. Chem. Soc.</i> <sup>11</sup>        | 2020 |
| Nanodeficient Cu nanosheet            | 83.2   | 48.9                                           | 0.1 M K <sub>2</sub> SO <sub>4</sub> | <i>J. Am. Chem. Soc.</i> <sup>12</sup>        | 2020 |
| Iodine-modified Cu                    | 80     | 31.2                                           | 0.1 M KHCO <sub>3</sub>              | <i>Angew. Chem. Int. Ed.</i> <sup>13</sup>    | 2019 |
| Cu <sub>3</sub> N Nanocubes           | 60     | ~ 18                                           | 0.1 M KHCO <sub>3</sub>              | <i>Nano Lett.</i> <sup>14</sup>               | 2019 |
| Cu-on-Cu <sub>3</sub> N               | 64     | 25                                             | 0.1 M KHCO <sub>3</sub>              | <i>Nat. Commun.</i> <sup>15</sup>             | 2018 |
| 100-cycle Cu                          | 60.5   | 41                                             | 0.25 M KHCO <sub>3</sub>             | <i>Nat. Catal.</i> <sup>16</sup>              | 2018 |

**Table S2.** The electrical conductivities of 0.10 M K<sub>2</sub>SO<sub>4</sub>, 0.20 M KHCO<sub>3</sub> and 0.10 M K<sub>2</sub>HPO<sub>4</sub>.

| Electrolyte type and concentration     | Electrical conductivity (mS cm <sup>-1</sup> ) |
|----------------------------------------|------------------------------------------------|
| 0.10 M K <sub>2</sub> SO <sub>4</sub>  | 18.93                                          |
| 0.20 M KHCO <sub>3</sub>               | 17.46                                          |
| 0.10 M K <sub>2</sub> HPO <sub>4</sub> | 16.79                                          |

**Table S3.** Bulk pH values of electrolytes (catholyte): pristine, CO<sub>2</sub>-saturated and 100 C-electrolysed at -2.0 V.

| Electrolyte type and concentration     | Pristine | CO <sub>2</sub> -saturated | 100 C-electrolysis |
|----------------------------------------|----------|----------------------------|--------------------|
| 0.10 M K <sub>2</sub> SO <sub>4</sub>  | 6.0      | 4.7                        | 6.3                |
| 0.20 M KHCO <sub>3</sub>               | 8.6      | 7.1                        | 7.2                |
| 0.10 M K <sub>2</sub> HPO <sub>4</sub> | 9.0      | 6.5                        | 6.7                |

## Supplementary References

- 1 U. Sanyal and B. R. Jagirdar, *Inorg. Chem.*, 2012, **51**, 13023-13033.
- 2 Y. Yang, A. He, H. Li, Q. Zou, Z. Liu, C. Tao and J. Du, *ACS Catal.*, 2022, **12**, 12942-12953.
- 3 C. Kim, K. M. Cho, K. Park, J. Y. Kim, G.-T. Yun, F. M. Toma, I. Gereige and H.-T. Jung, *Adv. Funct. Mater.*, 2021, **31**, 2102142.
- 4 W. Y. Zhi, Y. T. Liu, S. L. Shan, C. J. Jiang, H. Wang and J. X. Lu, *J. CO<sub>2</sub> Util.*, 2021, **50**, 101594.
- 5 L. Shang, X. Lv, H. Shen, Z. Shao and G. Zheng, *J. Colloid Interface Sci.*, 2019, **552**, 426-431.
- 6 Y. Sha, J. Zhang, X. Cheng, M. Xu, Z. Su, Y. Wang, J. Hu, B. Han and L. Zheng, *Angew. Chem. Int. Ed.*, 2022, **61**, e202200039.
- 7 W. Liu, P. Zhai, A. Li, B. Wei, K. Si, Y. Wei, X. Wang, G. Zhu, Q. Chen, X. Gu, R. Zhang, W. Zhou and Y. Gong, *Nat. Commun.*, 2022, **13**, 1877.
- 8 B. Yang, K. Liu, H. Li, C. Liu, J. Fu, H. Li, J. E. Huang, P. Ou, T. Alkayyali, C. Cai, Y. Duan, H. Liu, P. An, N. Zhang, W. Li, X. Qiu, C. Jia, J. Hu, L. Chai, Z. Lin, Y. Gao, M. Miyachi, E. Cortes, S. A. Maier and M. Liu, *J. Am. Chem. Soc.*, 2022, **144**, 3039-3049.
- 9 M. Li, Y. Ma, J. Chen, R. Lawrence, W. Luo, M. Sacchi, W. Jiang and J. Yang, *Angew. Chem. Int. Ed.*, 2021, **60**, 11487-11493.
- 10 T. Kim and G. T. R. Palmore, *Nat. Commun.*, 2020, **11**, 3622.
- 11 W. Zhang, C. Huang, Q. Xiao, L. Yu, L. Shuai, P. An, J. Zhang, M. Qiu, Z. Ren and Y. Yu, *J. Am. Chem. Soc.*, 2020, **142**, 11417-11427.
- 12 B. Zhang, J. Zhang, M. Hua, Q. Wan, Z. Su, X. Tan, L. Liu, F. Zhang, G. Chen, D. Tan, X. Cheng, B. Han, L. Zheng and G. Mo, *J. Am. Chem. Soc.*, 2020, **142**, 13606-13613.
- 13 D. Gao, I. Sinev, F. Scholten, R. M. Aran-Ais, N. J. Divins, K. Kvashnina, J. Timoshenko and B. Roldan Cuenya, *Angew. Chem. Int. Ed.*, 2019, **58**, 17047-17053.
- 14 Z. Yin, C. Yu, Z. Zhao, X. Guo, M. Shen, N. Li, M. Muzzio, J. Li, H. Liu, H. Lin, J. Yin, G. Lu, D. Su and S. Sun, *Nano Lett.*, 2019, **19**, 8658-8663.
- 15 Z. Q. Liang, T. T. Zhuang, A. Seifitokaldani, J. Li, C. W. Huang, C. S. Tan, Y. Li, P. De Luna, C. T. Dinh, Y. Hu, Q. Xiao, P. L. Hsieh, Y. Wang, F. Li, R. Quintero-Bermudez, Y. Zhou, P. Chen, Y. Pang, S. C. Lo, L. J. Chen, H. Tan, Z. Xu, S. Zhao, D. Sinton and E. H. Sargent, *Nat. Commun.*, 2018, **9**, 3828.
- 16 K. Jiang, R. B. Sandberg, A. J. Akey, X. Y. Liu, D. C. Bell, J. K. Norskov, K. R. Chan and H. T. Wang, *Nat. Catal.*, 2018, **1**, 111-119.
